# Supplementary material for: A feasibility study on implementing pre-emptive pharmacogenomics testing in outpatient clinics in Singapore (IMPT study)
Source: Springer Nature journal article supplement (doi:10.1038/s41397-025-00366-1), 2025-03-12
Supplement: MOESM1 [file 41397_2025_366_MOESM1_ESM.pdf]

# 1 Supplementary Materials

- 2 Supplementary Material S1: Sample pharmacogenomics report
- 3 Supplementary Material S2: Survey Questions
